# Supplementary material for: Correction to: Immunostimulatory RNA leads to functional reprogramming of myeloid-derived suppressor cells in pancreatic cancer
Source: PubMed Central journal article supplement (PMC6916026; doi:10.1186/s40425-019-0830-7), 2019-12-16

**Figure S1**

**Spleen**

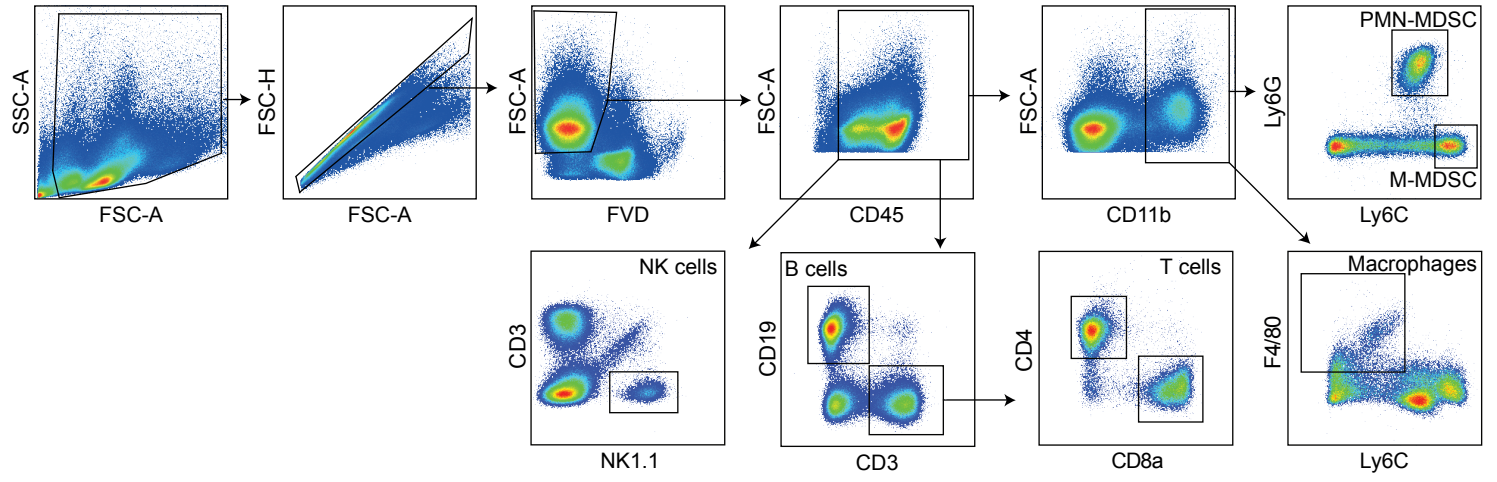

**Tumor**

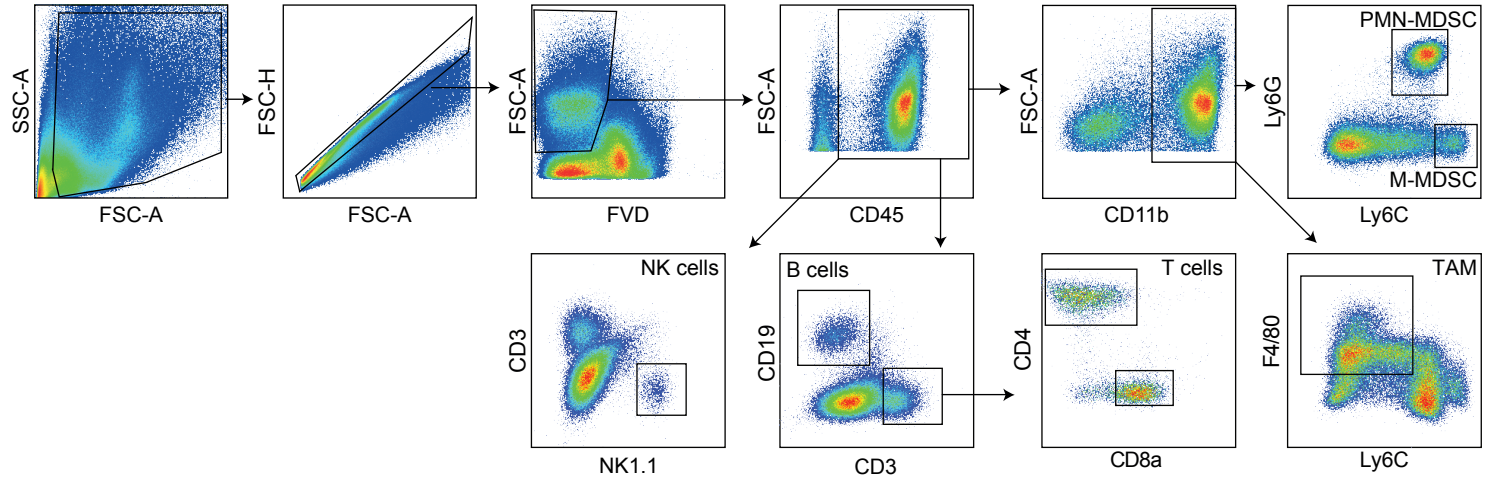

**Figure S2**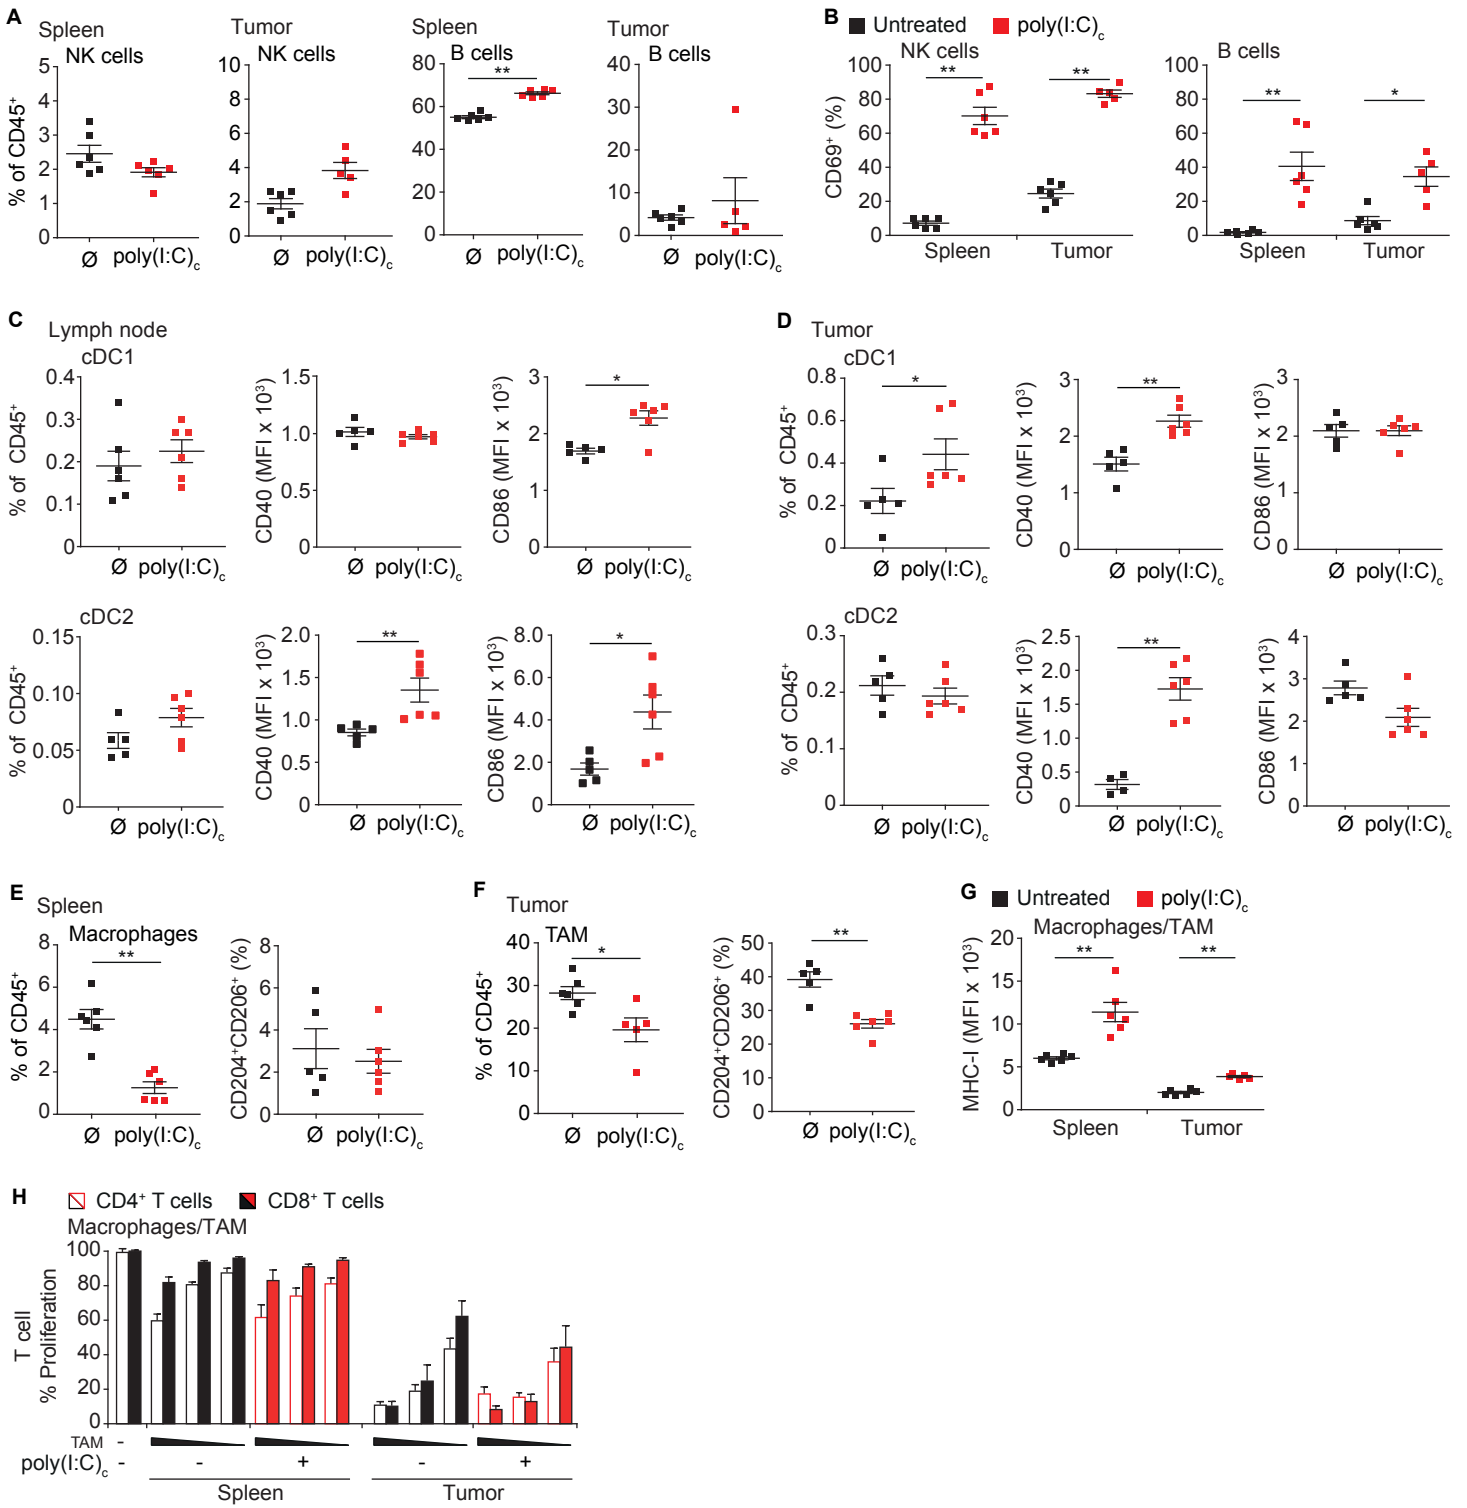

**Figure S3**

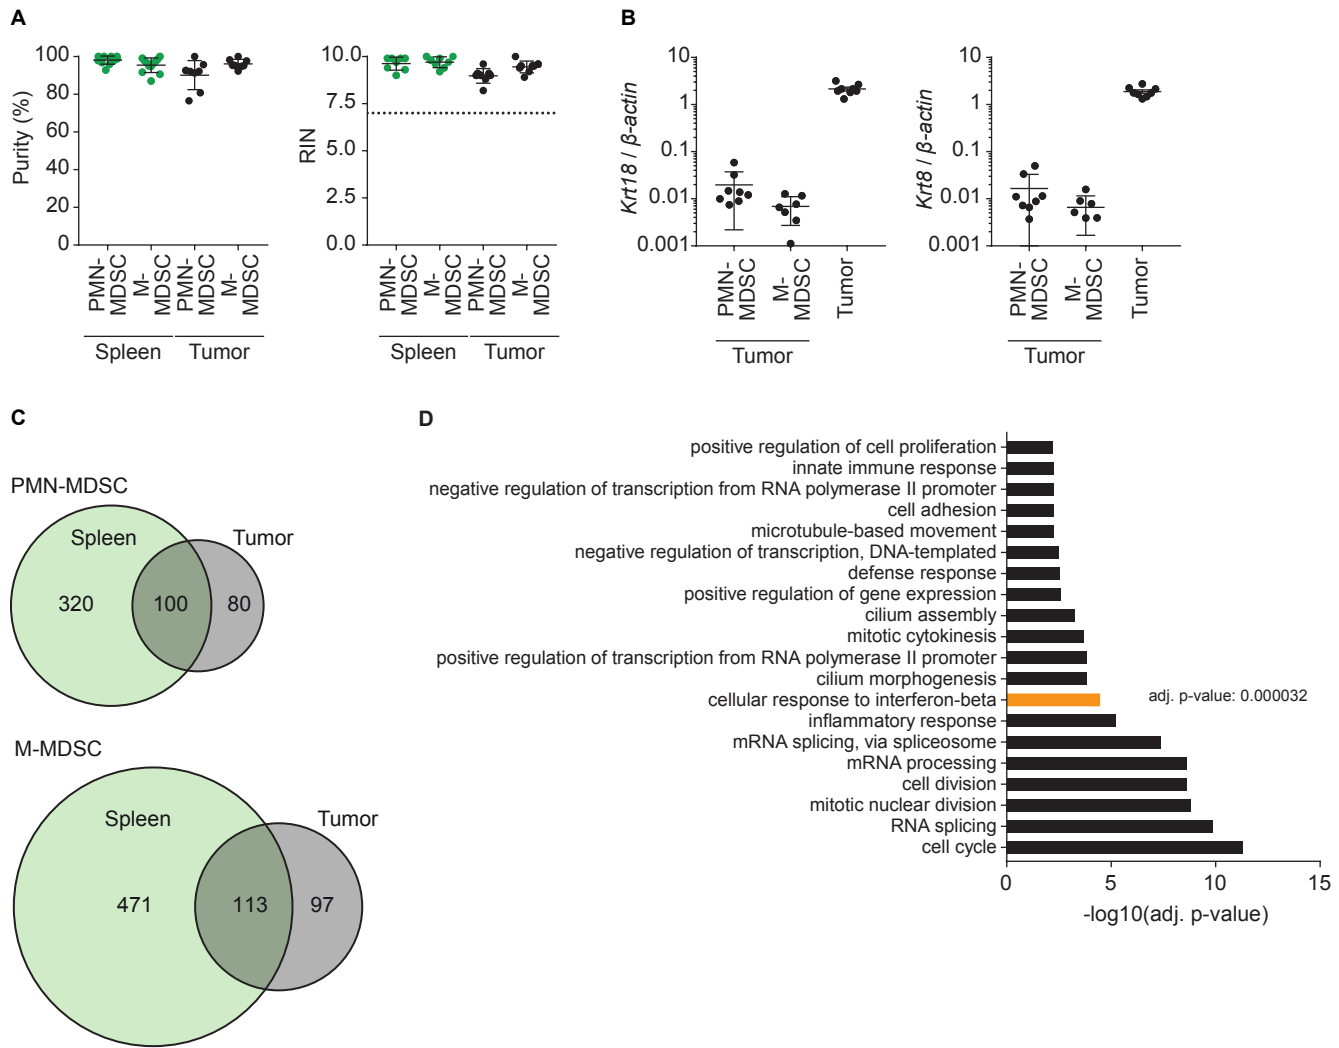

Figure S4

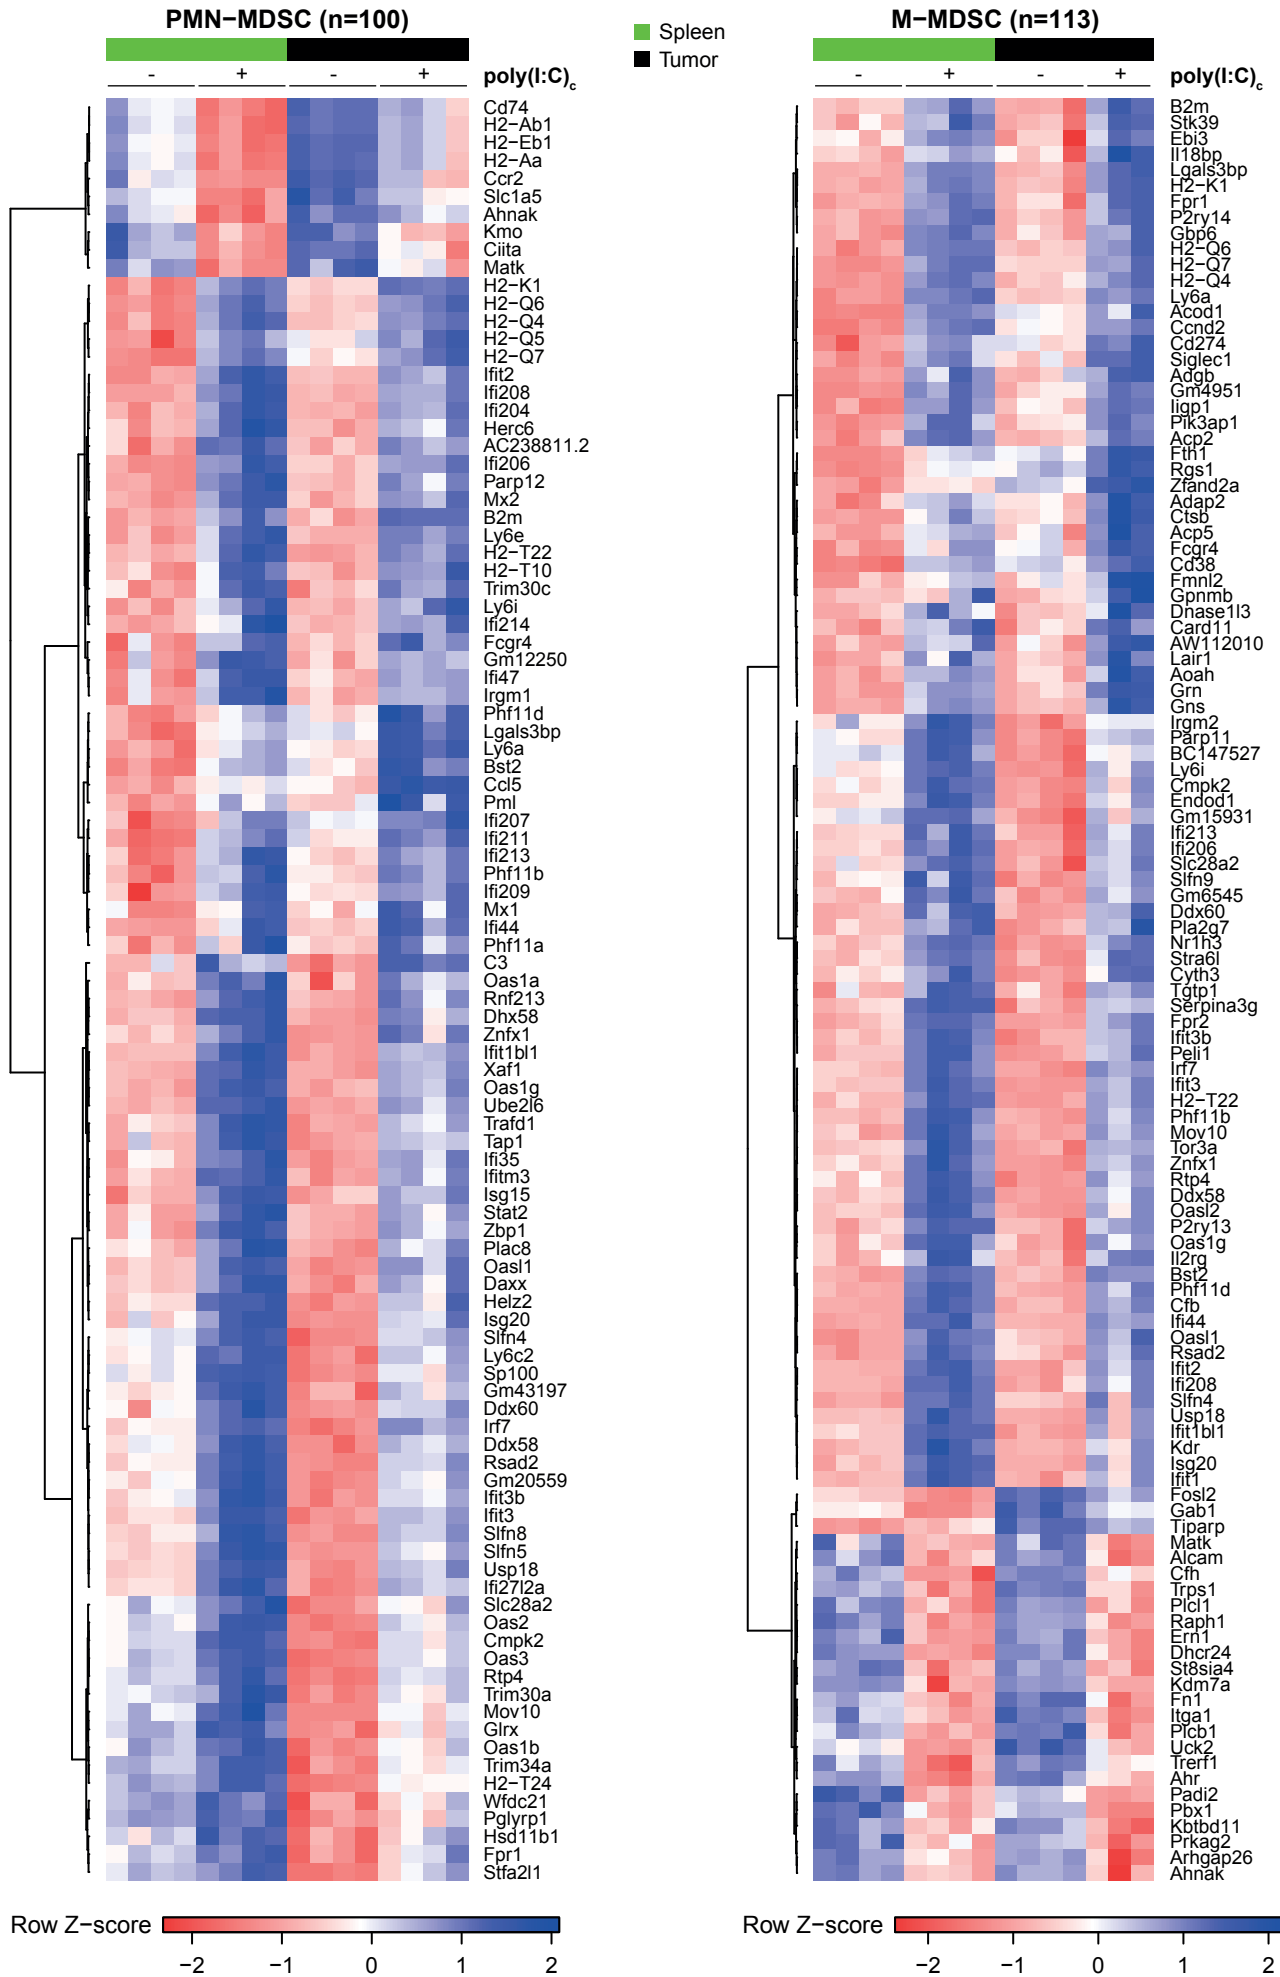

Supplement: 40425_2019_830_MOESM1_ESM.pdf [file 40425_2019_830_MOESM1_ESM.pdf]
